# Supplementary material for: Determinants of Population-Based Cancer Screening Performance at Primary Healthcare Institutions in China
Source: MDPI journal article supplement (doi:10.3390/ijerph18063312), 2021-03-23
Supplement: s1 [file s1]

## Supplementary Materials

### Univariate analysis stratified by urban and rural

**Table S1.** Univariate analysis on the determinants of completion of the target number of breast, cervical, and colorectal cancer screening in urban district

| Characteristics                                              | Category                       | Breast cancer<br>(n=81) | Cervical cancer<br>(n=82) | Colorectal cancer<br>(n=95) |
|--------------------------------------------------------------|--------------------------------|-------------------------|---------------------------|-----------------------------|
|                                                              |                                | OR(95%CI)               | OR(95%CI)                 | OR(95%CI)                   |
| GDP of district (¥100 million)                               | ≤800 <sup>†</sup>              | 1                       | 1                         | 1                           |
|                                                              | >800                           | 0.67(0.25, 1.76)        | 0.53(0.20, 1.41)          | 0.18(0.02, 1.46)*           |
| Number of screening tests                                    | <2 <sup>†</sup>                | 1                       | 1                         | — <sup>‡</sup>              |
|                                                              | ≥2                             | 1.27(0.46, 3.54)        | 0.96 (0.36, 2.52)         | —                           |
| Frequency of staff training                                  | Once a year <sup>†</sup>       | 1                       | 1                         | 1                           |
|                                                              | Less than once a year or never | 1.15(0.18, 7.34)        | 1.33 (0.21, 8.55)         | 0.23(0.02, 2.81)            |
| Number of staff dedicated to screening <sup>§</sup>          | <3 <sup>†</sup>                | 1                       | 1                         | 1                           |
|                                                              | ≥3                             | 1.74(0.63, 4.79)        | 2.08(0.70, 6.14)*         | 6.98(1.64, 29.79)**         |
| Frequency of introduction to residents of screening programs | ≥4 times a year <sup>†</sup>   | 1                       | 1                         | 1                           |
|                                                              | <4 times a year                | 1.52(0.56, 4.11)        | 1.13 (0.41, 3.10)         | 1.19(0.29, 4.97)            |
| Telephone invitation of target population                    | Yes <sup>†</sup>               | 1                       | 1                         | — <sup>‡</sup>              |
|                                                              | No                             | 0.82(0.14, 4.81)        | 0.36(0.04, 3.25)          | —                           |

\*  $P<0.2$ ; \*\* $P<0.01$ . † Reference. ‡ Not included in the regression analysis. § Cutoff value of the number of staff dedicated to screening colorectal cancer screening is: <10 staff members (reference), ≥10 staff members.

**Table S2.** Univariate analysis on the determinants of completion of the target number of breast, cervical, and colorectal cancer screening in rural district

| Characteristics                                              | Category                       | Breast cancer<br>(n=81) | Cervical cancer<br>(n=82) | Colorectal cancer<br>(n=95) |
|--------------------------------------------------------------|--------------------------------|-------------------------|---------------------------|-----------------------------|
|                                                              |                                | OR(95%CI)               | OR(95%CI)                 | OR(95%CI)                   |
| GDP of district (¥100 million)                               | ≤800 <sup>†</sup>              | 1                       | 1                         | 1                           |
|                                                              | >800                           | 0.53 (0.20, 1.43)       | 0.90(0.39, 2.08)          | 1.17(0.21, 6.58)            |
| Number of screening tests                                    | <2 <sup>†</sup>                | 1                       | 1                         | — <sup>‡</sup>              |
|                                                              | ≥2                             | 1.34(0.48, 3.72)        | 1.89 (0.79, 4.49)*        | —                           |
| Frequency of staff training                                  | Once a year <sup>†</sup>       | 1                       | 1                         | 1                           |
|                                                              | Less than once a year or never | —                       | —                         | 0.15(0.01, 1.54)*           |
| Number of staff dedicated to screening <sup>§</sup>          | <3 <sup>†</sup>                | 1                       | 1                         | 1                           |
|                                                              | ≥3                             | 1.56 (0.48, 5.07)       | 2.11(0.77, 5.73)*         | 0.94(0.17, 5.31)            |
| Frequency of introduction to residents of screening programs | ≥4 times a year <sup>†</sup>   | 1                       | 1                         | 1                           |
|                                                              | <4 times a year                | 0.54(0.18, 1.60)        | 0.90 (0.40, 2.02)         | 1.86(0.30, 11.46)           |
| Telephone invitation of target population                    | Yes <sup>†</sup>               | 1                       | 1                         | — <sup>‡</sup>              |
|                                                              | No                             | 2.70(0.32, 22.58)       | 2.09(0.44, 9.98)          | —                           |

\*  $P<0.2$ . † Reference. ‡ Not included in the regression analysis. § Cutoff value of the number of staff dedicated to screening colorectal cancer screening is: <10 staff members (reference), ≥10 staff members.
